# Supplementary material for: Changes in demand for emergency ambulances during a nationwide lockdown that resulted in elimination of COVID-19: an observational study from New Zealand
Source: PubMed Central journal article supplement — BMJ Open. 2020 Dec 23;10(12):e044726. doi: 10.1136/bmjopen-2020-044726 (PMC7759754; doi:10.1136/bmjopen-2020-044726), 2020-12-23
Supplement: bmjopen-2020-044726supp002.pdf [file bmjopen-2020-044726supp002.pdf]

Table S2. Descriptive analysis, demographics (n=624,928). Changes in distribution.

|                      | Pre-Lockdown (PL)<br>n=588,690 | Lockdown (LD)<br>n=36,238 | $\Delta$ %= LD – PL | P-value |
|----------------------|--------------------------------|---------------------------|---------------------|---------|
| Sex                  |                                |                           |                     |         |
| Female               | 309991a (52.7%)                | 19326b (53.4%)            | 0.7%                | 0.01    |
| Male                 | 278232a (47.3%)                | 16854b (46.6%)            | -0.7%               |         |
| Age                  |                                |                           |                     | <0.001  |
| 0-5                  | 27258a (4.6%)                  | 1326b (3.7%)              | -1.0%               |         |
| 6-15                 | 21401a (3.6%)                  | 934b (2.6%)               | -1.1%               |         |
| 16-25                | 57119a (9.7%)                  | 2875b (7.9%)              | -1.8%               |         |
| 26-45                | 92530a (15.7%)                 | 6201b (17.1%)             | 1.4%                |         |
| 46-65                | 122699a (20.8%)                | 7948b (22%)               | 1.1%                |         |
| >65                  | 267540a (45.5%)                | 16917b (46.7%)            | 1.3%                |         |
| Ethnicity            |                                |                           |                     | 0.07    |
| European/Other       | 424918a (82.6%)                | 25998b (83.1%)            | 0.5%                |         |
| Māori                | 61858a (12%)                   | 3664a (11.7%)             | -0.3%               |         |
| Pacific Peoples      | 27709a (5.4%)                  | 1623a (5.2%)              | -0.2%               |         |
| Rurality             |                                |                           |                     | 0.25    |
| Rural                | 129002a (22.5%)                | 7948a (22.2%)             | -0.3%               |         |
| Urban                | 444054a (77.5%)                | 27774a (77.8%)            | 0.3%                |         |
| Location             |                                |                           |                     | <0.001  |
| Aged Care Facility   | 33334a (5.7%)                  | 1689b (4.7%)              | -1.0%               |         |
| Healthcare Facility† | 51831a (8.8%)                  | 1404b (3.9%)              | -4.9%               |         |
| Public / other       | 111771a (19%)                  | 2930b (8.1%)              | -10.9%              |         |
| Home                 | 390934a (66.5%)                | 30166b (83.4%)            | 16.9%               |         |

\*P<0.05 is significant;  $\chi^2$  test for nominal values. Independent T-test for continuous values. Missing values were <3% for all variables except Ethnicity (14.6%), the proportion of missing values for this variable was similar across both Pre-Lockdown and Lockdown periods. Percentages may not add to 100% due to rounding. †Healthcare Facility refers to non-hospital treatment localities such as a general practice clinic. The results from the z-test are depicted by each subscript letter. With each letter denoting a subset of final categories whose column proportions do not differ significantly from each other at the 0.05 level.
