# Supplementary material for: Changes in demand for emergency ambulances during a nationwide lockdown that resulted in elimination of COVID-19: an observational study from New Zealand
Source: PubMed Central journal article supplement — BMJ Open. 2020 Dec 23;10(12):e044726. doi: 10.1136/bmjopen-2020-044726 (PMC7759754; doi:10.1136/bmjopen-2020-044726), 2020-12-23
Supplement: bmjopen-2020-044726supp003.pdf [file bmjopen-2020-044726supp003.pdf]

Table S3. Descriptive analysis, Clinical impression (n=624,928). Changes in distribution.

|                         | Pre-Lockdown (PL)<br>n=588,690 | Lockdown (LD)<br>n=36,238 | $\Delta$ %= LD – PL | P-value |
|-------------------------|--------------------------------|---------------------------|---------------------|---------|
| Clinical Impression     |                                |                           |                     | <0.001  |
| Abdominal Pain          | 45479a (7.8%)                  | 3240b (9.1%)              | 1.3%                |         |
| Cardiac                 | 61083a (10.4%)                 | 4082b (11.4%)             | 1.0%                |         |
| Collapse                | 27296a (4.7%)                  | 1516b (4.2%)              | -0.4%               |         |
| Haemorrhage             | 10932a (1.9%)                  | 717a (2%)                 | 0.1%                |         |
| Infection               | 37374a (6.4%)                  | 2369a (6.6%)              | 0.3%                |         |
| Mental Health           | 13966a (2.4%)                  | 1318b (3.7%)              | 1.3%                |         |
| Metabolic               | 28580a (4.9%)                  | 1616b (4.5%)              | -0.4%               |         |
| Other Medical           | 76741a (13.1%)                 | 4875b (13.6%)             | 0.5%                |         |
| Pain                    | 68678a (11.7%)                 | 4333b (12.1%)             | 0.4%                |         |
| Poisoning               | 18519a (3.2%)                  | 802b (2.2%)               | -0.9%               |         |
| Respiratory             | 67144a (11.4%)                 | 3449b (9.6%)              | -1.8%               |         |
| Stroke                  | 13652a (2.3%)                  | 916b (2.6%)               | 0.2%                |         |
| Trauma                  | 117127a (20%)                  | 6535b (18.3%)             | -1.7%               |         |
| Did alcohol contribute? |                                |                           |                     | <0.001  |
| No                      | 417011a (93.3%)                | 25493b (95.1%)            | 1.9%                |         |
| Yes                     | 30076a (6.7%)                  | 1300b (4.9%)              | -1.9%               |         |
| Mechanism of injury     |                                |                           |                     | <0.001  |
| Assault                 | 8924a (6%)                     | 445a (5.7%)               | -0.3%               |         |
| Fall                    | 75225a (50.8%)                 | 4603b (58.9%)             | 8.0%                |         |
| Other trauma            | 39278a (26.5%)                 | 2254b (28.8%)             | 2.3%                |         |
| Road traffic crash      | 24534a (16.6%)                 | 518b (6.6%)               | -10.0%              |         |

\*P<0.05 is significant;  $\chi^2$  test for nominal values. Independent t-test for continuous values. Missing values were <3% for all variables except Did alcohol contribute? (27.1%) and Mechanism of Injury (15.1%, across all Trauma cases), the proportion of missing values for these variables was similar across both Pre-Lockdown and Lockdown periods. Percentages may not add to 100% due to rounding. The results from the z-test are depicted by each subscript letter. With each letter denoting a subset of final categories whose column proportions do not differ significantly from each other at the 0.05 level.
